# Supplementary material
Source: PubMed Central journal article supplement (PMC7520436)
Supplement: BPH-177-4750-s001.pdf [file BPH-177-4750-s001.pdf]

# Targeting IL-5 pathway against airway hyperresponsiveness: a challenge between benralizumab and mepolizumab

Luigino Calzetta, Beatrice Ludovica Ritondo, Maria Gabriella Matera, Francesco Facciolo, Paola Rogliani.

## Online data supplement

**e-Table 1.** Main characteristics of donors and normal ranges in agreement with GINA recommendations (GINA, 2020).

| Variables                          | Values    | Normal range |
|------------------------------------|-----------|--------------|
| Gender (male/female)               | 8/8       | /            |
| Age (years)                        | 50.0±3.0  | /            |
| Height (cm)                        | 164.8±2.0 | /            |
| Weight (Kg)                        | 68.3±3.0  | /            |
| Smoking status:                    |           |              |
| current                            | 4         | /            |
| former                             | 5         | /            |
| never                              | 7         | /            |
| IgE                                | 55.8±5.7  | <100         |
| Pack years                         | 24.4±5.6  | /            |
| FEV <sub>1</sub> (L)               | 2.71±0.07 | /            |
| FEV <sub>1</sub> (% predicted)     | 93.1±2.4  | >80          |
| FEV <sub>1</sub> reversibility (%) | 4.8±1.3   | <12%         |
| FVC (L)                            | 3.34±0.09 | /            |
| FEV <sub>1</sub> /FVC              | 0.81±0.01 | >0.7         |

FEV<sub>1</sub>: forced expiratory volume in 1 s; FVC: forced vital capacity; GINA: Global Initiative for Asthma; IgE: immunoglobulin E; IU: international units.

**e-Table 2.** Dataset of sectional tissues used in this study.

| Treatment    | Concentration | Contractile stimuli |                                                |            |                                        |    | Total Stimuli | n bronchial ring each stimulus | Total bronchial rings |
|--------------|---------------|---------------------|------------------------------------------------|------------|----------------------------------------|----|---------------|--------------------------------|-----------------------|
|              |               | CRC to histamine    | Plateau to histamine (EC <sub>50-70-90</sub> ) | FRC to EFS | Specific EFS (EF <sub>50-70-90</sub> ) | QS |               |                                |                       |
| C-           | /             | 1                   | 1                                              | 1          | 1                                      | 1  | 5             | 5                              | 25                    |
| C+           | /             | 1                   | 1                                              | 1          | 1                                      | 1  | 5             | 5                              | 25                    |
| Benralizumab | 0.1 µg/ml     | 0                   | 1                                              | 0          | 0                                      | 0  | 1             | 5                              | 5                     |
| Benralizumab | 0.3 µg/ml     | 0                   | 1                                              | 0          | 0                                      | 0  | 1             | 5                              | 5                     |
| Benralizumab | 1 µg/ml       | 1                   | 1                                              | 1          | 1                                      | 1  | 5             | 5                              | 25                    |
| Benralizumab | 3 µg/ml       | 1                   | 1                                              | 1          | 1                                      | 1  | 5             | 5                              | 25                    |
| Benralizumab | 10 µg/ml      | 1                   | 1                                              | 1          | 1                                      | 1  | 5             | 5                              | 25                    |
| Benralizumab | 30 µg/ml      | 1                   | 1                                              | 1          | 1                                      | 1  | 5             | 5                              | 25                    |
| Benralizumab | 100 µg/ml     | 1                   | 1                                              | 1          | 1                                      | 1  | 5             | 5                              | 25                    |
| Mepolizumab  | 0.1 µg/ml     | 0                   | 1                                              | 0          | 0                                      | 0  | 1             | 5                              | 5                     |
| Mepolizumab  | 0.3 µg/ml     | 0                   | 1                                              | 0          | 0                                      | 0  | 1             | 5                              | 5                     |
| Mepolizumab  | 1 µg/ml       | 1                   | 1                                              | 1          | 1                                      | 1  | 5             | 5                              | 25                    |
| Mepolizumab  | 3 µg/ml       | 1                   | 1                                              | 1          | 1                                      | 1  | 5             | 5                              | 25                    |
| Mepolizumab  | 10 µg/ml      | 1                   | 1                                              | 1          | 1                                      | 1  | 5             | 5                              | 25                    |
| Mepolizumab  | 30 µg/ml      | 1                   | 1                                              | 1          | 1                                      | 1  | 5             | 5                              | 25                    |
| Mepolizumab  | 100 µg/ml     | 1                   | 1                                              | 1          | 1                                      | 1  | 5             | 5                              | 25                    |
|              |               |                     |                                                |            |                                        |    |               | Time controls                  | 46                    |
|              |               |                     |                                                |            |                                        |    |               | Total                          | 366                   |

## Results

### Baseline characteristics of isolated airways

Independently by the smoking habit of donors, there were no significant differences ( $P>0.05$ ) between the wet weight of the human isolated bronchial rings used in the different treatments arms (C-  $87.50\pm 7.01$  mg; C+  $92.50\pm 7.91$  mg; benralizumab  $90.50\pm 7.63$  mg; mepolizumab  $86.75\pm 7.92$  mg).

The  $E_{max}$  in C- specimens stimulated by histamine, EFS, and QS was  $1857.00\pm 171.60$  mg/100 mg bronchial tissue,  $458.90\pm 24.28$  mg/100 mg bronchial tissue, and  $291.52\pm 90.27$  mg/100 mg bronchial tissue, respectively. Passive sensitization induced AHR in C+ airways, leading to significant overall increase in ASM contractile response to histamine ( $+227.85\pm 24.23$  % vs. C-,  $P<0.001$ ), EFS ( $+117.45\pm 12.63$  % vs. C-,  $P<0.001$ ), and QS ( $+113.58\pm 17.39$  % vs. C-,  $P<0.05$ ).

In C+ airways the  $EC_{50}$ ,  $EC_{70}$ , and  $EC_{90}$  to histamine were  $0.8$   $\mu$ M,  $2.2$   $\mu$ M, and  $28.0$   $\mu$ M, respectively; the  $EF_{50}$ ,  $EF_{70}$ , and  $EF_{90}$  to EFS were  $14.1$  Hz,  $20.9$  Hz, and  $32.8$  Hz, respectively.

The levels of IL-5 detectable in the supernatant increased after 3 h incubation of bronchial rings with sensitizing serum. The concentrations of IL-5 released by C+ bronchi were significantly greater ( $P<0.01$ ) than those release by C- airways between 6 h of incubation with sensitizing and non-sensitizing sera, respectively (e-Figure 1). After 18 h of incubation, the maximal concentration of IL-5 in the supernatant was  $12.23\pm 2.80$  fold greater in C+ than in C- tissues ( $P<0.001$ ). The quantification of IL-5 released by bronchial tissue and the data reported in e-Figure 1 have been calculated by detracting the background amount of IL-5 provided by the sensitizing serum.

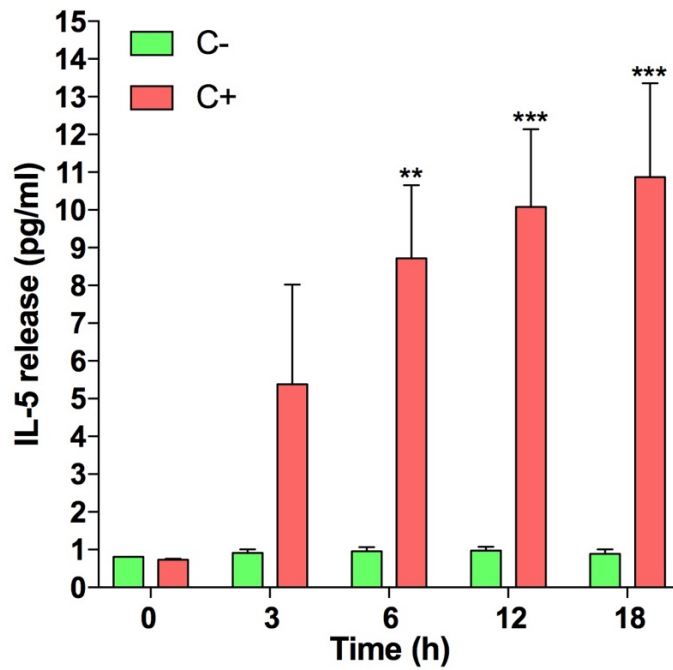

**e-Figure 1.** Levels of IL-5 detectable in the supernatant of C- and C+ during the sensitizing procedure. \*\* P<0.01 and \*\*\* P<0.001 vs. C- (statistical analysis assessed by two-way ANOVA); bars represent the mean±SEM of n=5 bronchial tissue from different subjects. C+: positive control, isolated bronchi incubated with sensitizing serum; C-: negative control, isolated bronchi incubated with non-sensitizing; IL-5: interleukin 5.

**e-Table 3.** Effect of overnight incubation with different concentrations of benralizumab and mepolizumab on the FRCs to EFS in passively sensitized bronchi.

|                                                        | C-               | C+                   | Benralizumab     |                     |                      |                      |                      | Mepolizumab      |                  |                    |                      |                      |
|--------------------------------------------------------|------------------|----------------------|------------------|---------------------|----------------------|----------------------|----------------------|------------------|------------------|--------------------|----------------------|----------------------|
|                                                        |                  |                      | 1 µg/ml          | 3 µg/ml             | 10 µg/ml             | 30 µg/ml             | 100 µg/ml            | 1 µg/ml          | 3 µg/ml          | 10 µg/ml           | 30 µg/ml             | 100 µg/ml            |
| <b>EFS E<sub>max</sub> (mg/100mg bronchial tissue)</b> | 197.60±2<br>9.86 | 458.90±24.2<br>8 ### | 452.00±4<br>3.83 | 315.10±26.7<br>6 ** | 255.00±33.3<br>2 *** | 211.50±15.4<br>8 *** | 182.30±43.6<br>4 *** | 402.90±7<br>1.97 | 404.40±4<br>9.58 | 294.19±62.<br>61 * | 196.10±34.0<br>3 *** | 191.90±47.2<br>8 *** |
| <b>EFS pEF<sub>50</sub></b>                            | 1.21±0.11        | 1.15±0.03            | 1.09±0.07        | 1.00±0.12           | 0.93±0.18            | 1.12±0.05            | 1.19±0.17            | 1.08±0.13        | 1.14±0.10        | 1.09±0.18          | 1.27±0.11            | 1.20±0.19            |

### P<0.001 vs. C- (statistical analysis assessed by Student's t-test); \*P<0.05, \* P<0.05, \*\* P<0.01, and \*\*\* P<0.001 vs. C+ (statistical analysis assessed by one-way ANOVA); data represent the mean±SEM of n=5 bronchial tissue from different subjects. C+: positive control, passively sensitized bronchi; C-: negative control, non-sensitized bronchi; EFS: electrical field stimulation; FRC: frequency-response curve; EF<sub>50</sub>: frequency inducing 50% E<sub>max</sub>; E<sub>max</sub>: maximal effect; pEF<sub>50</sub>: negative logarithm of EF<sub>50</sub>.

**e-Table 4.** Efficacy and potency of benralizumab and mepolizumab after overnight incubation on the AHR to different EFS frequencies (EF<sub>50-90</sub>) in passively sensitized bronchi. The pharmacological analysis was performed by assessing E<sub>max</sub> as the difference in airway contractility between passively sensitized and non-sensitized bronchi.

|                                                                                | <b>Benralizumab</b> |                   |                  | <b>Mepolizumab</b> |                  |                  |
|--------------------------------------------------------------------------------|---------------------|-------------------|------------------|--------------------|------------------|------------------|
| <b>Contractile tone to EFS at:</b>                                             | EF <sub>50</sub>    | EF <sub>70</sub>  | EF <sub>90</sub> | EF <sub>50</sub>   | EF <sub>70</sub> | EF <sub>90</sub> |
| <b>Benralizumab or mepolizumab E<sub>max</sub> (mg/100mg bronchial tissue)</b> | -120.69±27.15       | -<br>105.13±25.01 | -105.44±26.53    | -110.34±20.33      | -107.87±20.68    | -108.51±21.52    |
| <b>Benralizumab or mepolizumab pIC<sub>50</sub></b>                            | 6.84±0.17           | 7.00±0.18         | 7.63±0.16 *      | 7.06±0.18          | 7.13±0.17        | 7.18±0.10        |

\* P<0.05 vs. mepolizumab (statistical analysis assessed by Student's t-test); Data represent the mean±SEM of n=5 bronchial tissue from different subjects. AHR: airway hyperresponsiveness; C+: positive control, passively sensitized bronchi; C-: negative control, non-sensitized bronchi; EF<sub>n</sub>: frequency inducing n% E<sub>max</sub>; E<sub>max</sub>: maximal effect; EFS: electrical field stimulation; IC<sub>50</sub>: concentration inducing 50% inhibition AHR to histamine in passively sensitized bronchi; pIC<sub>50</sub>: -logIC<sub>50</sub>.

## References

GINA (2020). Global Initiative for Asthma (GINA). Global strategy for asthma management and prevention. Available at: [https://ginasthma.org/wp-content/uploads/2020/04/GINA-2020-full-report -final- wms.pdf](https://ginasthma.org/wp-content/uploads/2020/04/GINA-2020-full-report-final-wms.pdf). Last accessed August 21, 2020.
